# Supplementary material for: Effects of Virgin Olive Oils Differing in Their Bioactive Compound Contents on Biomarkers of Oxidative Stress and Inflammation in Healthy Adults: A Randomized Double-Blind Controlled Trial
Source: MDPI journal article supplement (doi:10.3390/nu11030561), 2019-03-06
Supplement: s1 [file s1]

**Supplementary Table 1.** Clinical and biochemical characteristics of subjects at baseline according to olive oil administration sequence.

| Characteristics          | Sequence 1 | Sequence 2 | Sequence 3 |
|--------------------------|------------|------------|------------|
| Age, years               | 32 ± 2     | 29 ± 2     | 28 ± 2     |
| Gender, male n (%)       | 12 (60)    | 10 (53)    | 8 (42)     |
| BMI, kg/m <sup>2</sup>   | 24 ± 1     | 24 ± 1     | 24 ± 1     |
| Waist circumference, cm  | 80 ± 2     | 78 ± 3     | 77 ± 2     |
| Males                    | 80 ± 3     | 82 ± 4     | 82 ± 2     |
| Females                  | 81 ± 5     | 73 ± 3     | 73 ± 2     |
| Glucose, mg/dL           | 90 ± 2     | 92 ± 2     | 87 ± 2     |
| HDLc, mg/dL              | 58 ± 2     | 58 ± 3     | 59 ± 2     |
| Males                    | 55 ± 3     | 51 ± 3     | 52 ± 3     |
| Females                  | 64 ± 2     | 63 ± 5     | 64 ± 3     |
| LDLc, mg/dL              | 117 ± 9    | 107 ± 7    | 102 ± 5    |
| Total cholesterol, mg/dL | 192 ± 10   | 180 ± 7    | 175 ± 7    |
| Triglycerides mg/dL      | 87 ± 7     | 81 ± 13    | 67 ± 5     |
| SBP, mmHg                | 121 ± 2    | 120 ± 3    | 118 ± 3    |
| DBP, mmHg                | 77 ± 2     | 74 ± 2     | 71 ± 2     |
| Pulse pressure, mmHg     | 44 ± 2     | 46 ± 3     | 47 ± 2     |

Values are expressed as means ± SEMs. ANOVA and  $\chi^2$  test were used to compare results between groups. Sequence 1: OVOO, VOO and FOO,  $n = 20$ ; Sequence 2: VOO, FOO and OVOO,  $n = 19$ ; Sequence 3: FOO, OVOO and VOO,  $n = 19$ . BMI, body mass index; DBP, diastolic blood pressure; FOO, functional olive oil; HDLc, high density lipoprotein cholesterol; LDLc, low density lipoprotein cholesterol; SBP, systolic blood pressure; SEM, standard error of the mean; VOO, virgin olive oil.
